# Supplementary material for: The Splicing Factor XAB2 interacts with ERCC1-XPF and XPG for RNA-loop processing during mammalian development
Source: bioRxiv or medRxiv preprint supplement (doi:10.1101/2020.07.20.211441), 2020-07-21
Supplement: Supplementary file [file media-3.pdf]

**Table S2. A list of the 636 XAB2-bound proteins identified in P15 livers shared across the three bXAB2 biological replicates compared to BirA control livers.**

| Access. no | Symbol  | bXab UP1 | bXab_UP3 | bXab_UP2 | BirA UP1 | BirA UP3 | BirA UP2 |
|------------|---------|----------|----------|----------|----------|----------|----------|
| Q9QXS1     | Actn4   | 188      | 197      | 202      | 44       | 62       | 193      |
| Q5YD48     | A1cf    | 8        | 8        | 16       | 1        | 0,01     | 6        |
| O35452     | Tnxb    | 116      | 130      | 137      | 30       | 58       | 124      |
| Q68FG2     | Sptbn2  | 103      | 111      | 118      | 31       | 49       | 101      |
| E9PZ16     | Hspg2   | 97       | 115      | 115      | 27       | 44       | 105      |
| E9QP46     | Syne2   | 97       | 187      | 235      | 6        | 38       | 154      |
| F6XCT0     | Macf1   | 40       | 48       | 44       | 0,01     | 0,01     | 0,01     |
| Q921L6     | Cttn    | 23       | 24       | 27       | 0,01     | 0,01     | 0,01     |
| A0A0R4JOV1 | Ints10  | 8        | 10       | 11       | 0,01     | 0,01     | 0,01     |
| E9Q360     | Ints10  | 8        | 10       | 11       | 0,01     | 0,01     | 0,01     |
| A2A9P6     | Cdk11b  | 7        | 10       | 9        | 0,01     | 0,01     | 0,01     |
| Q9JKX4     | Aatf    | 6        | 10       | 14       | 0,01     | 0,01     | 7        |
| E9PWQ3     | Col6a3  | 60       | 67       | 66       | 34       | 26       | 52       |
| A0A087WR5C | Fn1     | 59       | 72       | 74       | 23       | 32       | 64       |
| Q3UHL6     | Fn1     | 59       | 72       | 74       | 23       | 32       | 64       |
| B7ZNH7     | Col14a1 | 57       | 63       | 71       | 33       | 46       | 62       |
| A0A1D5RLS1 | Eps15l1 | 4        | 8        | 8        | 0,01     | 0,01     | 0,01     |
| D3Z315     | Cope    | 6        | 7        | 6        | 0,01     | 0,01     | 0,01     |
| E9PVU0     | Myo6    | 49       | 50       | 57       | 11       | 20       | 49       |
| F6RJ39     | Acin1   | 25       | 33       | 43       | 6        | 20       | 33       |
| Q5SYD0     | Myo1d   | 47       | 55       | 55       | 16       | 26       | 51       |
| Q80YX1     | Tnc     | 44       | 51       | 54       | 16       | 15       | 48       |
| Q8R2S9     | Actr8   | 20       | 24       | 23       | 2        | 10       | 19       |
| Q9QYC0     | Add1    | 14       | 21       | 23       | 3        | 5        | 17       |
| Q9Z103     | Adnp    | 8        | 16       | 21       | 0,01     | 0,01     | 13       |
| Q9QZQ1     | Afdn    | 40       | 53       | 59       | 5        | 9        | 0,01     |
| Q9QZQ1     | Afdn    | 40       | 53       | 59       | 5        | 9        | 46       |
| Q8CJF7     | Ahctf1  | 32       | 59       | 61       | 5        | 15       | 48       |
| P53995     | Anapc1  | 19       | 31       | 41       | 0,01     | 8        | 27       |
| Q91W96     | Anapc4  | 14       | 13       | 18       | 0,01     | 2        | 14       |
| O35488     | Slc27a2 | 34       | 32       | 35       | 28       | 22       | 31       |
| Q8BTZ4     | Anapc5  | 9        | 13       | 17       | 0,01     | 4        | 10       |
| Q8BTZ4     | Anapc5  | 9        | 13       | 17       | 0,01     | 4        | 10       |
| Q9WVM3     | Anapc7  | 17       | 17       | 23       | 0,01     | 6        | 16       |
| A0A0R4J1N7 | Ank1    | 11       | 20       | 21       | 0,01     | 0,01     | 9        |
| Q8C8R3     | Ank2    | 11       | 25       | 28       | 0,01     | 0,01     | 14       |
| P26231     | Ctnna1  | 30       | 41       | 42       | 19       | 19       | 36       |
| P97449     | Anpep   | 5        | 10       | 15       | 0,01     | 0,01     | 10       |
| Q8CFQ3     | Aqr     | 32       | 40       | 39       | 1        | 14       | 29       |
| A2AQA7     | Aqr     | 32       | 40       | 39       | 1        | 14       | 29       |
| E9Q7E2     | Arid2   | 13       | 20       | 17       | 0,01     | 0,01     | 9        |
| Q9WTL8     | Arntl   | 7        | 7        | 12       | 0,01     | 0,01     | 5        |
| Q9WTL8     | Arntl   | 7        | 7        | 12       | 0,01     | 0,01     | 5        |
| Q8BI84     | Mia3    | 26       | 54       | 40       | 0,01     | 4        | 19       |

|            |          |    |    |    |      |      |      |
|------------|----------|----|----|----|------|------|------|
| P98203     | Arvcf    | 19 | 23 | 23 | 0,01 | 3    | 17   |
| P98203     | Arvcf    | 19 | 23 | 23 | 0,01 | 3    | 17   |
| P98203     | Arvcf    | 19 | 23 | 23 | 0,01 | 3    | 17   |
| P98203     | Arvcf    | 19 | 23 | 23 | 0,01 | 3    | 17   |
| Q80YQ1     | Thbs1    | 25 | 34 | 35 | 6    | 11   | 31   |
| A0A1L1STC6 | Syne1    | 25 | 70 | 77 | 0,01 | 2    | 40   |
| Q9EP89     | Lactb    | 25 | 24 | 26 | 10   | 12   | 22   |
| Q3U741     | Ddx17    | 24 | 28 | 30 | 13   | 17   | 25   |
| E9PZJ8     | Ascc3    | 13 | 18 | 14 | 0,01 | 0,01 | 10   |
| Q92511     | Atad3    | 32 | 32 | 29 | 10   | 12   | 24   |
| M0QWP1     | Agrn     | 22 | 40 | 43 | 3    | 3    | 39   |
| P56480     | Atp5b    | 19 | 19 | 21 | 14   | 11   | 16   |
| A2AS05     | Helz2    | 21 | 12 | 11 | 0,01 | 0,01 | 3    |
| A2AS03     | Helz2    | 21 | 12 | 11 | 0,01 | 0,01 | 3    |
| G3X973     | Stab1    | 21 | 21 | 24 | 0,01 | 0,01 | 18   |
| A2AKD7     | Snta1    | 5  | 8  | 8  | 0,01 | 0,01 | 2    |
| Q03265     | Atp5a1   | 20 | 20 | 21 | 15   | 12   | 15   |
| Q8R4H2     | Arhgef12 | 11 | 15 | 14 | 0,01 | 0,01 | 4    |
| F8VQN6     | Arhgef12 | 11 | 15 | 14 | 0,01 | 0,01 | 4    |
| P08032     | Spta1    | 17 | 13 | 13 | 0,01 | 0,01 | 5    |
| Q8K019     | Bclaf1   | 9  | 25 | 27 | 0,01 | 5    | 19   |
| Q8K019     | Bclaf1   | 9  | 25 | 27 | 0,01 | 5    | 19   |
| Q3TL44     | Nlrx1    | 9  | 12 | 12 | 1    | 0,01 | 3    |
| Q8CCJ3     | Ufl1     | 8  | 11 | 9  | 0,01 | 0,01 | 3    |
| Q99JY9     | Actr3    | 19 | 19 | 21 | 10   | 10   | 17   |
| Q6PAL0     | Bend3    | 25 | 29 | 34 | 0,01 | 8    | 29   |
| P35441     | Thbs1    | 24 | 33 | 35 | 6    | 10   | 0,01 |
| Q6PGF5     | Bms1     | 17 | 19 | 23 | 0,01 | 2    | 19   |
| Q921S7     | Mrpl37   | 8  | 11 | 8  | 0,01 | 0,01 | 4    |
| E9Q6A7     | Bptf     | 19 | 36 | 39 | 0,01 | 3    | 23   |
| E9QQ10     | Akap9    | 7  | 12 | 10 | 0,01 | 0,01 | 4    |
| Q8C5W0     | Clmn     | 10 | 12 | 9  | 0,01 | 0,01 | 5    |
| Q8C5W0     | Clmn     | 10 | 12 | 9  | 0,01 | 0,01 | 5    |
| Q8C5W0     | Clmn     | 10 | 12 | 9  | 0,01 | 0,01 | 5    |
| E9Q397     | Sptb     | 27 | 24 | 20 | 0,01 | 0,01 | 11   |
| O35646     | Capn6    | 11 | 12 | 19 | 3    | 5    | 13   |
| Q9CVB6     | Arpc2    | 16 | 21 | 19 | 10   | 8    | 15   |
| E9Q2E4     | Hectd4   | 16 | 19 | 18 | 0,01 | 0,01 | 9    |
| Q8CH18     | Ccar1    | 14 | 22 | 32 | 0,01 | 4    | 14   |
| Q8VDP4     | Ccar2    | 15 | 18 | 18 | 0,01 | 2    | 12   |
| Q5SV80     | Myo19    | 6  | 9  | 8  | 0,01 | 0,01 | 4    |
| P82198     | Tgfb1    | 15 | 18 | 18 | 9    | 7    | 13   |
| A0A1D5RLQ5 | Cdc42bpa | 12 | 21 | 18 | 0,01 | 0,01 | 8    |
| D3YYN8     | Cdc42bpa | 12 | 21 | 18 | 0,01 | 0,01 | 8    |
| A2A6Q5     | Cdc27    | 9  | 14 | 17 | 1    | 4    | 9    |
| H7BX44     | Cdc42bpa | 12 | 21 | 18 | 0,01 | 0,01 | 8    |
| E9PVY0     | Cdc42bpa | 12 | 21 | 18 | 0,01 | 0,01 | 8    |

|            |          |    |    |    |      |      |      |
|------------|----------|----|----|----|------|------|------|
| P61161     | Actr2    | 15 | 15 | 18 | 6    | 9    | 14   |
| Q3UU96     | Cdc42bpa | 12 | 21 | 18 | 0,01 | 0,01 | 8    |
| Q80TN4     | Dnajc16  | 7  | 13 | 19 | 0,01 | 0,01 | 7    |
| J3JS23     | Zfp62    | 14 | 23 | 23 | 0,01 | 6    | 19   |
| A2A6Q5     | Cdc27    | 9  | 14 | 17 | 1    | 4    | 9    |
| Q9DC48     | Cdc40    | 23 | 26 | 26 | 0,01 | 6    | 21   |
| S4R1B9     | Taf1     | 14 | 30 | 30 | 0,01 | 6    | 17   |
| Q6A068     | Cdc5l    | 26 | 31 | 37 | 5    | 12   | 27   |
| B1Q2W7     | Taf1     | 14 | 30 | 30 | 0,01 | 6    | 17   |
| P24788     | Cdk11b   | 7  | 10 | 9  | 0,01 | 0,01 | 0,01 |
| E9Q3L2     | Pi4ka    | 6  | 8  | 9  | 0,01 | 0,01 | 4    |
| A0A140T8I9 | Pi4ka    | 6  | 8  | 9  | 0,01 | 0,01 | 4    |
| A2AWT5     | Ubtf     | 14 | 24 | 28 | 4    | 8    | 20   |
| A2ADB1     | Spen     | 13 | 26 | 35 | 0,01 | 2    | 26   |
| P68368     | Tuba4a   | 13 | 13 | 14 | 0,01 | 0,01 | 10   |
| O35218     | Cpsf2    | 13 | 22 | 29 | 1    | 5    | 19   |
| A0A0A0MQA: | Tuba4a   | 13 | 13 | 14 | 0,01 | 0,01 | 10   |
| Q9CRB9     | Chchd3   | 13 | 16 | 15 | 8    | 6    | 11   |
| P40201     | Chd1     | 24 | 36 | 39 | 0,01 | 8    | 29   |
| Q920A7     | Afg3l1   | 6  | 11 | 14 | 0,01 | 0,01 | 5    |
| Q5SUH7     | Clint1   | 9  | 14 | 11 | 0,01 | 0,01 | 7    |
| Q6PDQ2     | Chd4     | 40 | 56 | 60 | 4    | 16   | 50   |
| E9QAS5     | Chd4     | 40 | 56 | 60 | 4    | 16   | 50   |
| E9QAS4     | Chd4     | 40 | 56 | 60 | 4    | 16   | 50   |
| A2AJK6     | Chd7     | 13 | 29 | 33 | 0,01 | 0,01 | 21   |
| F8WHU7     | Stag1    | 12 | 23 | 26 | 0,01 | 4    | 9    |
| Q8CGZ0     | Cherp    | 14 | 18 | 20 | 0,01 | 4    | 14   |
| A0A1D5RL92 | Cherp    | 14 | 18 | 20 | 0,01 | 4    | 14   |
| Q8C147     | Dock8    | 12 | 23 | 22 | 0,01 | 0,01 | 11   |
| Q5SUH6     | Clint1   | 9  | 14 | 11 | 0,01 | 0,01 | 7    |
| B1AYU7     | Cwc22    | 16 | 17 | 21 | 0,01 | 0,01 | 12   |
| E9QMQ3     | Triobp   | 8  | 16 | 14 | 0,01 | 0,01 | 9    |
| G5E8J2     | Ank1     | 11 | 20 | 21 | 0,01 | 0,01 | 9    |
| G8JL84     | Ank1     | 11 | 20 | 21 | 0,01 | 0,01 | 9    |
| Q02357     | Ank1     | 11 | 20 | 21 | 0,01 | 0,01 | 9    |
| Q8R1B4     | Eif3c    | 9  | 17 | 13 | 1    | 0,01 | 7    |
| A0A1W2P711 | Mia2     | 11 | 25 | 16 | 0,01 | 0,01 | 6    |
| B7ZW98     | Ank1     | 11 | 20 | 21 | 0,01 | 0,01 | 9    |
| E9QNT8     | Ank1     | 11 | 20 | 21 | 0,01 | 0,01 | 9    |
| Q91ZV0     | Mia2     | 11 | 25 | 16 | 0,01 | 0,01 | 6    |
| D3YTV8     | Ank1     | 11 | 20 | 21 | 0,01 | 0,01 | 9    |
| Q0VGY9     | Ank1     | 11 | 20 | 21 | 0,01 | 0,01 | 9    |
| Q02357     | Ank1     | 11 | 20 | 21 | 0,01 | 0,01 | 9    |
| Q02357     | Ank1     | 11 | 20 | 21 | 0,01 | 0,01 | 9    |
| Q8C196     | Cps1     | 37 | 32 | 28 | 18   | 10   | 18   |
| Q9R0Q6     | Arpc1a   | 11 | 9  | 13 | 6    | 0,01 | 8    |
| Q9EPU4     | Cpsf1    | 27 | 39 | 49 | 0,01 | 11   | 34   |

|            |         |    |    |    |      |      |    |
|------------|---------|----|----|----|------|------|----|
| S4R2F3     | Ank2    | 11 | 25 | 28 | 0,01 | 0,01 | 14 |
| Q9QXK7     | Cpsf3   | 13 | 17 | 23 | 0,01 | 7    | 13 |
| Q02357     | Ank1    | 11 | 20 | 21 | 0,01 | 0,01 | 9  |
| E9PUM4     | Tln2    | 31 | 41 | 48 | 0,01 | 0,01 | 26 |
| A0A1L1SQ51 | Tln2    | 31 | 41 | 48 | 0,01 | 0,01 | 26 |
| Q02357     | Ank1    | 11 | 20 | 21 | 0,01 | 0,01 | 9  |
| D3Z5M4     | Ank1    | 11 | 20 | 21 | 0,01 | 0,01 | 9  |
| Q02357     | Ank1    | 11 | 20 | 21 | 0,01 | 0,01 | 9  |
| Q71LX4     | Tln2    | 30 | 41 | 47 | 0,01 | 0,01 | 26 |
| Q8BG67     | Efr3a   | 7  | 9  | 11 | 0,01 | 0,01 | 6  |
| Q8BG67     | Efr3a   | 7  | 9  | 11 | 0,01 | 0,01 | 6  |
| A0A1D5RLL3 | Efr3a   | 7  | 9  | 11 | 0,01 | 0,01 | 6  |
| Q3TXE3     | Tyk2    | 9  | 12 | 14 | 0,01 | 0,01 | 8  |
| Q8CIZ8     | Vwf     | 19 | 20 | 25 | 2    | 0,01 | 13 |
| E9QPU1     | Vwf     | 19 | 20 | 25 | 2    | 0,01 | 13 |
| Q8VE19     | Mios    | 14 | 17 | 16 | 0,01 | 0,01 | 10 |
| A0A0R4J1W7 | Cdc23   | 10 | 19 | 24 | 4    | 6    | 14 |
| P63154     | Crnk1   | 19 | 23 | 25 | 0,01 | 12   | 16 |
| A0A140LI54 | Pnpla6  | 14 | 17 | 21 | 0,01 | 2    | 12 |
| Q3TRM4     | Pnpla6  | 14 | 17 | 21 | 0,01 | 2    | 12 |
| Q3TRM4     | Pnpla6  | 14 | 17 | 21 | 0,01 | 2    | 12 |
| Q3TRM4     | Pnpla6  | 14 | 17 | 21 | 0,01 | 2    | 12 |
| A0A0A0MQ73 | Kmt2d   | 9  | 11 | 15 | 0,01 | 0,01 | 8  |
| Q8BGZ4     | Cdc23   | 10 | 19 | 24 | 4    | 6    | 14 |
| Q02248     | Ctnnb1  | 24 | 27 | 29 | 7    | 12   | 23 |
| P30999     | Ctnnd1  | 36 | 41 | 42 | 12   | 18   | 35 |
| P30999     | Ctnnd1  | 36 | 42 | 43 | 0,01 | 0,01 | 35 |
| A2AS45     | Pkp4    | 13 | 17 | 16 | 0,01 | 0,01 | 10 |
| Q62018     | Ctr9    | 31 | 36 | 43 | 2    | 15   | 32 |
| Q8C5N3     | Cwc22   | 16 | 17 | 21 | 0,01 | 0,01 | 12 |
| Q8C5N3     | Cwc22   | 16 | 17 | 21 | 0,01 | 0,01 | 12 |
| Q9JHU4     | Dync1h1 | 58 | 84 | 65 | 2    | 6    | 45 |
| P49222     | Epb42   | 10 | 14 | 17 | 0,01 | 0,01 | 11 |
| Q6PAC3     | Dcaf13  | 10 | 11 | 13 | 0,01 | 0,01 | 7  |
| E0CYM1     | Filip1l | 9  | 20 | 20 | 0,01 | 1    | 16 |
| H3BK65     | Eps15   | 8  | 11 | 12 | 0,01 | 0,01 | 7  |
| Q5JC28     | Eps15   | 8  | 11 | 12 | 0,01 | 0,01 | 7  |
| P42567     | Eps15   | 8  | 11 | 12 | 0,01 | 0,01 | 7  |
| Q3U1J4     | Ddb1    | 10 | 14 | 9  | 0,01 | 0,01 | 4  |
| Q91VR5     | Ddx1    | 13 | 17 | 17 | 0,01 | 0,01 | 13 |
| A7TU71     | Shroom2 | 13 | 24 | 29 | 0,01 | 0,01 | 18 |
| Q80Y44     | Ddx10   | 8  | 20 | 23 | 0,01 | 4    | 17 |
| A2ALU4     | Shroom2 | 13 | 24 | 29 | 0,01 | 0,01 | 18 |
| Q501J6     | Ddx17   | 24 | 28 | 30 | 13   | 17   | 25 |
| Q9JIK5     | Ddx21   | 23 | 26 | 33 | 0,01 | 7    | 27 |
| D3Z0M9     | Ddx23   | 26 | 33 | 36 | 0,01 | 6    | 32 |
| Q62167     | Ddx3x   | 30 | 31 | 34 | 10   | 16   | 30 |

|            |          |    |    |    |      |      |      |
|------------|----------|----|----|----|------|------|------|
| Q810A7     | Ddx42    | 6  | 9  | 10 | 0,01 | 0,01 | 6    |
| Q569Z5     | Ddx46    | 5  | 11 | 12 | 0,01 | 0,01 | 5    |
| E0CYH7     | Filip1l  | 9  | 20 | 20 | 0,01 | 1    | 16   |
| Q5F2E8     | Taok1    | 12 | 11 | 11 | 0,01 | 0,01 | 7    |
| P31001     | Des      | 32 | 32 | 36 | 19   | 17   | 30   |
| O35286     | Dhx15    | 28 | 33 | 36 | 8    | 20   | 29   |
| O55111     | Dsg2     | 8  | 15 | 13 | 3    | 0,01 | 8    |
| A2ACQ1     | Dhx35    | 10 | 15 | 17 | 0,01 | 2    | 10   |
| Q8C8Z9     | Dtnb     | 10 | 13 | 13 | 0,01 | 2    | 7    |
| O70585     | Dtnb     | 10 | 13 | 13 | 0,01 | 2    | 7    |
| A2A4P0     | Dhx8     | 19 | 20 | 29 | 0,01 | 4    | 16   |
| A0A087WPL5 | Dhx9     | 50 | 53 | 62 | 26   | 0,01 | 0,01 |
| Q8C6K9     | Col6a6   | 8  | 11 | 8  | 2    | 0,01 | 4    |
| Q91X77     | Cyp2c50  | 8  | 8  | 4  | 0,01 | 0,01 | 0,01 |
| Q811D0     | Dlg1     | 11 | 16 | 13 | 2    | 2    | 8    |
| Q811D0     | Dlg1     | 11 | 15 | 13 | 2    | 2    | 8    |
| Q3UNN4     | Smarcc1  | 8  | 17 | 16 | 3    | 0,01 | 10   |
| P11531     | Dmd      | 13 | 23 | 23 | 0,01 | 4    | 13   |
| P63037     | Dnaja1   | 10 | 9  | 14 | 1    | 2    | 7    |
| H3BLH0     | Smarca2  | 29 | 34 | 35 | 0,01 | 0,01 | 25   |
| E9Q6A6     | Col6a6   | 8  | 11 | 8  | 2    | 0,01 | 4    |
| Q7TT50     | Cdc42bpb | 40 | 48 | 42 | 3    | 5    | 30   |
| A0A0G2JDM7 | Anapc5   | 9  | 13 | 17 | 0,01 | 4    | 10   |
| A0A0G2JE03 | Anapc5   | 9  | 13 | 17 | 0,01 | 4    | 10   |
| J3KMH5     | Mia3     | 8  | 22 | 17 | 0,01 | 0,01 | 0,01 |
| Q3TWF7     | Anapc5   | 9  | 13 | 17 | 0,01 | 4    | 10   |
| B2LVG5     | Cpsf4    | 7  | 10 | 11 | 0,01 | 1    | 7    |
| G5E8K2     | Ank3     | 7  | 19 | 23 | 0,01 | 3    | 13   |
| G5E8K5     | Ank3     | 7  | 19 | 23 | 0,01 | 3    | 13   |
| A0A0R4J2B6 | Rbbp5    | 7  | 13 | 12 | 1    | 2    | 5    |
| G5E8K5     | Ank3     | 7  | 19 | 23 | 0,01 | 3    | 13   |
| K3W4P2     | Ints1    | 8  | 12 | 19 | 0,01 | 0,01 | 12   |
| A0A0G2JH17 | Ints1    | 8  | 12 | 19 | 0,01 | 0,01 | 12   |
| G5E8K5     | Ank3     | 7  | 19 | 23 | 0,01 | 3    | 13   |
| O08810     | Eftud2   | 33 | 44 | 45 | 18   | 23   | 36   |
| P23116     | Eif3a    | 19 | 29 | 24 | 0,01 | 4    | 14   |
| D3Z7I0     | Gtf3c2   | 14 | 21 | 21 | 0,01 | 2    | 15   |
| P60229     | Eif3e    | 6  | 11 | 10 | 0,01 | 0,01 | 5    |
| Q8QZY1     | Eif3l    | 8  | 9  | 11 | 0,01 | 0,01 | 5    |
| G5E8K3     | Ank3     | 7  | 19 | 23 | 0,01 | 3    | 13   |
| Q8BYC6     | Taok3    | 11 | 12 | 13 | 2    | 0,01 | 9    |
| Q8CHI8     | Ep400    | 4  | 10 | 13 | 0,01 | 0,01 | 8    |
| Q8CHI8     | Ep400    | 4  | 10 | 13 | 0,01 | 0,01 | 8    |
| Q8CHI8     | Ep400    | 4  | 10 | 13 | 0,01 | 0,01 | 8    |
| Q8CHI8     | Ep400    | 4  | 10 | 13 | 0,01 | 0,01 | 8    |
| Q66JV4     | Rbm12b2  | 20 | 23 | 32 | 0,01 | 0,01 | 23   |
| O70318     | Epb41l2  | 22 | 34 | 31 | 0,01 | 3    | 23   |

|            |          |    |    |    |      |      |      |
|------------|----------|----|----|----|------|------|------|
| Q8R0W0     | Eppk1    | 16 | 22 | 18 | 0,01 | 4    | 14   |
| Q60902     | Eps15l1  | 4  | 8  | 8  | 0,01 | 0,01 | 0,01 |
| Q60902     | Eps15l1  | 4  | 8  | 8  | 0,01 | 0,01 | 0,01 |
| Q60902     | Eps15l1  | 4  | 8  | 8  | 0,01 | 0,01 | 0,01 |
| Q60902     | Eps15l1  | 4  | 8  | 8  | 0,01 | 0,01 | 0,01 |
| A0A1W2P812 | Ank3     | 7  | 19 | 23 | 0,01 | 3    | 13   |
| Q3V1V3     | Esf1     | 9  | 14 | 14 | 0,01 | 4    | 10   |
| Q0KL02     | Trio     | 19 | 21 | 28 | 0,01 | 3    | 17   |
| Q0KL02     | Trio     | 19 | 21 | 28 | 0,01 | 3    | 17   |
| S4R2K9     | Ank3     | 7  | 19 | 23 | 0,01 | 3    | 13   |
| P56960     | Exosc10  | 18 | 20 | 22 | 1    | 3    | 18   |
| Q8VBX6     | Mpdz     | 6  | 26 | 27 | 0,01 | 0,01 | 15   |
| Q9Z1T2     | Thbs4    | 12 | 12 | 15 | 0,01 | 2    | 11   |
| Q69ZR9     | Fam208a  | 27 | 44 | 54 | 0,01 | 10   | 44   |
| P48725     | Pcnt     | 6  | 12 | 11 | 0,01 | 0,01 | 5    |
| A0A1L1SQR4 | Dock6    | 30 | 40 | 48 | 0,01 | 0,01 | 35   |
| Q7TPD1     | Fbxo11   | 6  | 9  | 7  | 0,01 | 3    | 0,01 |
| Q8CGB6     | Tns2     | 17 | 27 | 37 | 0,01 | 5    | 24   |
| Q8CGB6     | Tns2     | 17 | 27 | 37 | 0,01 | 5    | 24   |
| Q8CGB6     | Tns2     | 17 | 27 | 37 | 0,01 | 5    | 24   |
| Q8CGB6     | Tns2     | 17 | 27 | 37 | 0,01 | 5    | 24   |
| Q6P6L0     | Filip1l  | 9  | 20 | 20 | 0,01 | 1    | 16   |
| Q6P6L0     | Filip1l  | 9  | 20 | 20 | 0,01 | 1    | 16   |
| Q8BTM8     | Flna     | 83 | 94 | 97 | 13   | 37   | 84   |
| B7FAU9     | Flna     | 83 | 94 | 97 | 13   | 37   | 84   |
| Q80X90     | Flnb     | 74 | 88 | 82 | 4    | 20   | 73   |
| D3YUX2     | Mpdz     | 6  | 26 | 27 | 0,01 | 0,01 | 15   |
| Q80U35     | Arhgef17 | 6  | 13 | 20 | 0,01 | 2    | 14   |
| Q8VBX6     | Mpdz     | 6  | 26 | 27 | 0,01 | 0,01 | 15   |
| Q91Z49     | Fytd1    | 11 | 16 | 20 | 5    | 7    | 14   |
| Q9R1K5     | Fzr1     | 5  | 9  | 11 | 0,01 | 0,01 | 6    |
| F8VPV0     | Pcnt     | 6  | 12 | 11 | 0,01 | 0,01 | 5    |
| Q4VAA7     | Snx33    | 6  | 11 | 10 | 0,01 | 0,01 | 5    |
| P26039     | Tln1     | 36 | 50 | 51 | 3    | 5    | 40   |
| A0A1W2P737 | Pcnt     | 6  | 12 | 11 | 0,01 | 0,01 | 5    |
| Q8VBX6     | Mpdz     | 6  | 26 | 27 | 0,01 | 0,01 | 15   |
| Q8R322     | Gle1     | 9  | 16 | 22 | 0,01 | 0,01 | 16   |
| D3YYT1     | Glyr1    | 11 | 17 | 21 | 6    | 8    | 15   |
| A2AWL7     | Mga      | 5  | 12 | 21 | 0,01 | 2    | 14   |
| Q8CI11     | Gnl3     | 14 | 18 | 17 | 1    | 6    | 12   |
| G5E8T6     | Magi3    | 11 | 12 | 16 | 0,01 | 0,01 | 12   |
| F6SMY7     | Mycbp2   | 52 | 74 | 75 | 0,01 | 5    | 61   |
| A0A087WP63 | Gm42715  | 5  | 12 | 11 | 0,01 | 0,01 | 6    |
| Q80X80     | C2cd2l   | 11 | 15 | 15 | 3    | 2    | 9    |
| Q99MI1     | Erc1     | 5  | 16 | 13 | 0,01 | 0,01 | 6    |
| Q6P5H2     | Nes      | 24 | 34 | 40 | 0,01 | 0,01 | 34   |
| Q8K284     | Gtf3c1   | 46 | 64 | 65 | 0,01 | 10   | 49   |

|            |          |    |    |    |      |      |      |
|------------|----------|----|----|----|------|------|------|
| Q3TMP1     | Gtf3c3   | 20 | 25 | 25 | 6    | 6    | 21   |
| Q8BMQ2     | Gtf3c4   | 26 | 36 | 38 | 3    | 9    | 29   |
| Q8R2T8     | Gtf3c5   | 13 | 17 | 17 | 2    | 7    | 11   |
| Q2PFD7     | Psd3     | 5  | 11 | 10 | 0,01 | 1    | 3    |
| Q8R2T8     | Gtf3c5   | 13 | 17 | 17 | 2    | 7    | 11   |
| V9GXP8     | Erc1     | 5  | 16 | 13 | 0,01 | 0,01 | 6    |
| G3X922     | Dnajc13  | 35 | 51 | 51 | 0,01 | 6    | 41   |
| Q2PFD7     | Psd3     | 5  | 11 | 10 | 0,01 | 1    | 3    |
| A0A0R4J0J8 | Specc1l  | 20 | 28 | 33 | 1    | 5    | 24   |
| Q2KN98     | Specc1l  | 20 | 28 | 33 | 1    | 5    | 24   |
| A2AWL7     | Mga      | 5  | 12 | 21 | 0,01 | 2    | 14   |
| E9QLG3     | Mga      | 5  | 12 | 21 | 0,01 | 2    | 14   |
| G3X9B1     | Heatr1   | 39 | 43 | 54 | 5    | 19   | 49   |
| E9QAM5     | Helz2    | 21 | 12 | 11 | 0,01 | 0,01 | 3    |
| Q9R1Y5     | Hic1     | 7  | 14 | 19 | 0,01 | 4    | 12   |
| Z4YJP0     | Hic1     | 7  | 14 | 19 | 0,01 | 4    | 12   |
| F8VPM7     | Erc1     | 5  | 16 | 13 | 0,01 | 0,01 | 6    |
| A0A1D5RM55 | Tns1     | 26 | 37 | 39 | 0,01 | 3    | 32   |
| A0A087WQSI | Tns1     | 26 | 37 | 39 | 0,01 | 3    | 32   |
| E9Q0S6     | Tns1     | 26 | 37 | 39 | 0,01 | 3    | 32   |
| V9GXF0     | Erc1     | 5  | 15 | 13 | 0,01 | 0,01 | 0,01 |
| V9GXH3     | Erc1     | 5  | 15 | 13 | 0,01 | 0,01 | 0,01 |
| Q2PFD7     | Psd3     | 5  | 11 | 10 | 0,01 | 1    | 3    |
| Q8BJA3     | Hmbox1   | 9  | 12 | 17 | 0,01 | 7    | 11   |
| H3BKM3     | Hmbox1   | 9  | 12 | 17 | 0,01 | 7    | 11   |
| H3BKF8     | Hmbox1   | 9  | 12 | 17 | 0,01 | 7    | 11   |
| E9PUQ5     | Golga2   | 16 | 25 | 21 | 4    | 4    | 13   |
| E9Q0A3     | Arhgef11 | 11 | 20 | 22 | 0,01 | 2    | 17   |
| Q9Z204     | Hnrnpc   | 23 | 26 | 28 | 12   | 14   | 24   |
| Q9Z204     | Hnrnpc   | 23 | 26 | 28 | 12   | 14   | 24   |
| P15116     | Cdh2     | 9  | 12 | 12 | 3    | 2    | 8    |
| D3YYT0     | Cdh2     | 9  | 12 | 12 | 3    | 2    | 8    |
| P14873     | Map1b    | 4  | 15 | 14 | 0,01 | 0,01 | 9    |
| P70333     | Hnrnph2  | 12 | 12 | 14 | 0,01 | 4    | 9    |
| E9PVP1     | Crybg1   | 15 | 20 | 22 | 0,01 | 3    | 15   |
| A0A0G2JG52 | Crybg1   | 15 | 20 | 22 | 0,01 | 3    | 15   |
| G5E924     | Hnrnpl   | 12 | 16 | 22 | 2    | 2    | 13   |
| Q8VHM5     | Hnrnpr   | 11 | 10 | 14 | 0,01 | 0,01 | 9    |
| Q00PI9     | Hnrnpul2 | 43 | 42 | 48 | 24   | 22   | 41   |
| Z4YKB8     | Hp1bp3   | 21 | 20 | 21 | 13   | 9    | 17   |
| Q3TEA8     | Hp1bp3   | 21 | 20 | 21 | 13   | 9    | 17   |
| P20029     | Hspa5    | 27 | 33 | 34 | 15   | 15   | 29   |
| Q9Z1M8     | Ik       | 13 | 25 | 31 | 4    | 9    | 18   |
| D3YU58     | Anapc7   | 17 | 17 | 23 | 0,01 | 6    | 16   |
| Q9Z1X4     | Ilf3     | 30 | 36 | 40 | 8    | 11   | 33   |
| Q9Z1X4     | Ilf3     | 30 | 36 | 40 | 8    | 11   | 33   |
| G5E8I8     | Cherp    | 14 | 18 | 20 | 0,01 | 4    | 14   |

|            |           |    |    |    |      |      |    |
|------------|-----------|----|----|----|------|------|----|
| Q6ZPV2     | Ino80     | 23 | 31 | 44 | 2    | 11   | 30 |
| Q6ZPV2     | Ino80     | 23 | 31 | 44 | 2    | 11   | 30 |
| Q6P4S8     | Ints1     | 8  | 12 | 19 | 0,01 | 0,01 | 12 |
| Q3UQ44     | lqgap2    | 42 | 50 | 47 | 5    | 10   | 39 |
| E9Q9B7     | Kidins220 | 4  | 12 | 11 | 0,01 | 1    | 7  |
| S4R1P5     | Dst       | 4  | 14 | 19 | 0,01 | 0,01 | 7  |
| Q8BZQ7     | Anapc2    | 11 | 18 | 18 | 0,01 | 3    | 14 |
| Q9JKF1     | lqgap1    | 20 | 27 | 28 | 0,01 | 4    | 19 |
| P11881     | ltpr1     | 40 | 44 | 47 | 7    | 8    | 30 |
| P11881     | ltpr1     | 40 | 44 | 47 | 7    | 8    | 30 |
| P11881     | ltpr1     | 40 | 44 | 47 | 7    | 8    | 30 |
| P11881     | ltpr1     | 40 | 44 | 47 | 7    | 8    | 30 |
| P11881     | ltpr1     | 40 | 44 | 47 | 7    | 8    | 30 |
| P11881     | ltpr1     | 40 | 44 | 47 | 7    | 8    | 30 |
| P11881     | ltpr1     | 40 | 44 | 47 | 7    | 8    | 30 |
| P11881     | ltpr1     | 40 | 44 | 47 | 7    | 8    | 30 |
| Q9Z329     | ltpr2     | 65 | 67 | 78 | 14   | 23   | 65 |
| P70227     | ltpr3     | 13 | 19 | 17 | 0,01 | 0,01 | 10 |
| Q8C1D8     | lws1      | 12 | 13 | 16 | 0,01 | 4    | 12 |
| Q6NZF1     | Zc3h11a   | 4  | 16 | 21 | 0,01 | 4    | 13 |
| A2AQD5     | Ssfa2     | 17 | 22 | 22 | 2    | 2    | 17 |
| A0A1Y7VMH7 | Kidins220 | 4  | 12 | 11 | 0,01 | 1    | 7  |
| A3KG93     | Kdm1a     | 6  | 9  | 12 | 0,01 | 0,01 | 7  |
| Q6ZQ88     | Kdm1a     | 6  | 9  | 12 | 0,01 | 0,01 | 7  |
| A0A1Y7VME5 | Kidins220 | 4  | 12 | 11 | 0,01 | 1    | 7  |
| A2AAE1     | Kiaa1109  | 21 | 37 | 37 | 0,01 | 4    | 22 |
| A2AAE1     | Kiaa1109  | 21 | 37 | 37 | 0,01 | 4    | 22 |
| A2AAE1     | Kiaa1109  | 21 | 37 | 37 | 0,01 | 4    | 22 |
| A2AAE1     | Kiaa1109  | 21 | 37 | 37 | 0,01 | 4    | 22 |
| Q6PDK2     | Kmt2d     | 9  | 11 | 15 | 0,01 | 0,01 | 8  |
| Q80YR9     | Rbm12b1   | 24 | 28 | 33 | 2    | 6    | 27 |
| Q99L88     | Sntb1     | 19 | 22 | 24 | 4    | 5    | 17 |
| Q68FD5     | Cltc      | 39 | 38 | 35 | 8    | 8    | 28 |
| Q5SXR6     | Cltc      | 39 | 38 | 35 | 8    | 8    | 28 |
| Q6P5B5     | Fxr2      | 20 | 17 | 23 | 2    | 4    | 19 |
| E9PU96     | Urb1      | 45 | 53 | 72 | 3    | 13   | 55 |
| G5E8G6     | Myo5b     | 54 | 54 | 64 | 3    | 10   | 51 |
| P21271     | Myo5b     | 54 | 54 | 64 | 3    | 10   | 51 |
| Q5XJE5     | Leo1      | 12 | 16 | 22 | 3    | 7    | 13 |
| Q8BH80     | Vapb      | 12 | 12 | 12 | 4    | 3    | 8  |
| Q9QY76     | Vapb      | 12 | 12 | 12 | 4    | 3    | 8  |
| P48678     | Lmna      | 54 | 49 | 52 | 30   | 35   | 48 |
| Q61586     | Gpam      | 21 | 22 | 24 | 6    | 4    | 19 |
| O88322     | Nid2      | 25 | 33 | 35 | 3    | 8    | 28 |
| Q91ZX7     | Lrp1      | 44 | 57 | 55 | 3    | 4    | 36 |
| A0A0R4J0I9 | Lrp1      | 44 | 57 | 55 | 3    | 4    | 36 |
| Q8BWT1     | Acaa2     | 14 | 17 | 15 | 6    | 4    | 11 |



|            |           |    |    |    |      |      |      |
|------------|-----------|----|----|----|------|------|------|
| Q6RHR9     | Magi1     | 7  | 15 | 15 | 0,01 | 0,01 | 11   |
| Q60847     | Col12a1   | 55 | 50 | 53 | 4    | 12   | 46   |
| E9PX70     | Col12a1   | 55 | 50 | 53 | 4    | 12   | 46   |
| Q6RHR9     | Magi1     | 7  | 15 | 15 | 0,01 | 0,01 | 0,01 |
| Q60847     | Col12a1   | 55 | 50 | 53 | 4    | 12   | 46   |
| Q60847     | Col12a1   | 55 | 50 | 53 | 4    | 12   | 46   |
| A0A0N4SUZ0 | Magi1     | 7  | 15 | 15 | 0,01 | 0,01 | 0,01 |
| Q9EQJ9     | Magi3     | 11 | 12 | 16 | 0,01 | 0,01 | 12   |
| Q8K310     | Matr3     | 48 | 48 | 55 | 16   | 17   | 49   |
| Q91VS8     | Farp2     | 19 | 23 | 23 | 2    | 5    | 19   |
| J3QMC5     | Mdn1      | 7  | 29 | 40 | 0,01 | 0,01 | 16   |
| A2ANY6     | Mdn1      | 7  | 29 | 40 | 0,01 | 0,01 | 16   |
| F7BGR7     | Gm21992   | 11 | 14 | 19 | 0,01 | 3    | 14   |
| C0HKD8     | Mfap1a    | 11 | 16 | 18 | 1    | 5    | 12   |
| C0HKD9     | Mfap1b    | 11 | 16 | 18 | 1    | 5    | 12   |
| H7BX50     | Mga       | 5  | 12 | 21 | 0,01 | 2    | 14   |
| Q8BML1     | Mical2    | 7  | 14 | 18 | 0,01 | 0,01 | 13   |
| D3Z598     | Ltbp4     | 29 | 36 | 40 | 2    | 11   | 35   |
| Q8K4G1     | Ltbp4     | 29 | 36 | 40 | 2    | 11   | 35   |
| A0A087WSN6 | Fn1       | 57 | 69 | 71 | 23   | 0,01 | 62   |
| B9EHT6     | Fn1       | 57 | 69 | 71 | 23   | 0,01 | 62   |
| Q810V0     | Mphosph10 | 9  | 7  | 12 | 0,01 | 0,01 | 8    |
| Q3TYA6     | Mphosph8  | 7  | 13 | 17 | 0,01 | 5    | 12   |
| P11247     | Mpo       | 6  | 12 | 16 | 0,01 | 2    | 9    |
| Q9JMH9     | Myo18a    | 76 | 86 | 86 | 13   | 23   | 71   |
| Q9JMH9     | Myo18a    | 76 | 86 | 86 | 13   | 23   | 71   |
| P46978     | Stt3a     | 16 | 12 | 15 | 5    | 4    | 8    |
| Q9R190     | Mta2      | 16 | 28 | 27 | 2    | 8    | 21   |
| Q924K8     | Mta3      | 4  | 16 | 13 | 0,01 | 4    | 9    |
| Q3UII8     | Mta3      | 4  | 16 | 13 | 0,01 | 4    | 9    |
| Q80WJ7     | Mtdh      | 19 | 21 | 25 | 3    | 8    | 20   |
| A0A0U1RNK7 | Dock7     | 36 | 50 | 51 | 6    | 10   | 44   |
| F8VQB6     | Myo10     | 12 | 13 | 22 | 0,01 | 0,01 | 17   |
| Q8R1A4     | Dock7     | 36 | 50 | 51 | 6    | 10   | 44   |
| A2A9M5     | Dock7     | 36 | 50 | 51 | 6    | 10   | 44   |
| E9PX48     | Dock7     | 36 | 50 | 51 | 6    | 10   | 44   |
| Q8R1A4     | Dock7     | 36 | 50 | 51 | 6    | 10   | 44   |
| A2A9M4     | Dock7     | 36 | 50 | 51 | 6    | 10   | 44   |
| Q5SWZ5     | Mprip     | 77 | 80 | 82 | 0,01 | 25   | 78   |
| F8WHL2     | Copa      | 31 | 43 | 37 | 7    | 11   | 29   |
| Q8CIE6     | Copa      | 31 | 43 | 37 | 7    | 11   | 29   |
| Q8BPM0     | Daam1     | 16 | 16 | 16 | 7    | 3    | 12   |
| Q8BPM0     | Daam1     | 16 | 16 | 16 | 7    | 3    | 12   |
| Q62383     | Supt6h    | 46 | 54 | 61 | 4    | 15   | 47   |
| P09405     | Ncl       | 17 | 22 | 21 | 4    | 11   | 17   |
| A2AL85     | Asph      | 14 | 19 | 18 | 6    | 5    | 14   |
| Q8BSY0     | Asph      | 14 | 19 | 18 | 6    | 5    | 14   |

|            |         |    |     |     |      |      |    |
|------------|---------|----|-----|-----|------|------|----|
| Q6PIJ4     | Nfrkb   | 14 | 33  | 34  | 5    | 11   | 27 |
| Q8BY02     | Nkrf    | 9  | 10  | 18  | 0,01 | 2    | 13 |
| H9KV00     | Son     | 39 | 53  | 58  | 2    | 19   | 49 |
| Q6DFW4     | Nop58   | 16 | 22  | 24  | 4    | 10   | 19 |
| Q9D6T0     | Nosip   | 4  | 10  | 12  | 0,01 | 0,01 | 5  |
| E9Q7G0     | Numa1   | 65 | 102 | 107 | 31   | 68   | 97 |
| F6ZQA3     | Numa1   | 18 | 32  | 36  | 0,01 | 23   | 32 |
| Q8BH74     | Nup107  | 34 | 36  | 39  | 9    | 14   | 34 |
| Q8R0G9     | Nup133  | 30 | 32  | 38  | 8    | 13   | 29 |
| E9Q3G8     | Nup153  | 13 | 22  | 26  | 3    | 10   | 19 |
| Q9Z0W3     | Nup160  | 34 | 38  | 46  | 8    | 14   | 38 |
| A0A0J9YUD5 | Nup205  | 29 | 26  | 37  | 2    | 5    | 32 |
| B9EJ54     | Nup205  | 29 | 26  | 37  | 2    | 5    | 32 |
| Q9QY81     | Nup210  | 14 | 17  | 21  | 3    | 4    | 15 |
| A0A0R4J116 | Nup210  | 14 | 17  | 21  | 3    | 4    | 15 |
| Q9JIH2     | Nup50   | 6  | 16  | 15  | 0,01 | 2    | 8  |
| A0A1B0GSX7 | Nup98   | 38 | 50  | 52  | 8    | 14   | 37 |
| Q8CIC2     | Nupl2   | 9  | 9   | 12  | 0,01 | 0,01 | 8  |
| E9QL43     | Nupl2   | 9  | 9   | 12  | 0,01 | 0,01 | 8  |
| Q61235     | Sntb2   | 22 | 26  | 26  | 4    | 10   | 21 |
| A0A0R4J150 | Osbp18  | 6  | 11  | 10  | 0,01 | 0,01 | 6  |
| B9EJ86     | Osbp18  | 6  | 12  | 10  | 0,01 | 0,01 | 6  |
| Q8K2T8     | Paf1    | 18 | 22  | 26  | 3    | 10   | 21 |
| Q63ZW7     | Patj    | 28 | 31  | 41  | 2    | 5    | 28 |
| P58501     | Paxbp1  | 19 | 27  | 30  | 0,01 | 3    | 18 |
| P49586     | Pcyt1a  | 7  | 9   | 9   | 0,01 | 0,01 | 5  |
| Q6NS46     | Pdcd11  | 28 | 38  | 49  | 0,01 | 11   | 39 |
| Q3TJD7     | Pdlim7  | 9  | 14  | 15  | 0,01 | 3    | 9  |
| Q4VA53     | Pds5b   | 14 | 15  | 19  | 0,01 | 4    | 14 |
| Q9QY23     | Pkp3    | 6  | 14  | 14  | 0,01 | 0,01 | 10 |
| Q9QY23     | Pkp3    | 6  | 14  | 14  | 0,01 | 0,01 | 10 |
| Q68FH0     | Pkp4    | 13 | 17  | 16  | 0,01 | 0,01 | 10 |
| E9Q6H8     | Plekha5 | 20 | 29  | 25  | 3    | 2    | 19 |
| Q8VCQ8     | Cald1   | 24 | 31  | 33  | 4    | 10   | 25 |
| Q922V4     | Plrg1   | 20 | 24  | 26  | 3    | 10   | 20 |
| Q60953     | Pml     | 20 | 30  | 29  | 10   | 12   | 22 |
| Q99KG5     | Lsr     | 17 | 16  | 18  | 5    | 4    | 14 |
| Q3TUU5     | Pnn     | 22 | 27  | 30  | 4    | 11   | 24 |
| O35691     | Pnn     | 22 | 27  | 30  | 4    | 11   | 24 |
| A2AJ88     | Pnpla7  | 7  | 14  | 13  | 0,01 | 0,01 | 7  |
| A2AJ88     | Pnpla7  | 7  | 14  | 13  | 0,01 | 0,01 | 7  |
| O35134     | Polr1a  | 6  | 17  | 19  | 0,01 | 0,01 | 7  |
| P70700     | Polr1b  | 5  | 12  | 10  | 0,01 | 0,01 | 3  |
| P08775     | Polr2a  | 34 | 50  | 54  | 4    | 15   | 40 |
| A0A0R4J0V5 | Polr2a  | 34 | 50  | 54  | 4    | 15   | 40 |
| Q8CFI7     | Polr2b  | 26 | 38  | 35  | 5    | 11   | 30 |
| Q9QZH3     | Ppie    | 10 | 12  | 12  | 0,01 | 3    | 6  |

|        |         |    |     |     |      |      |    |
|--------|---------|----|-----|-----|------|------|----|
| Q5FWX6 | Prkd3   | 5  | 8   | 11  | 0,01 | 0,01 | 4  |
| Q8K1Y2 | Prkd3   | 5  | 8   | 11  | 0,01 | 0,01 | 4  |
| Q99KP6 | Prpf19  | 10 | 15  | 16  | 2    | 6    | 12 |
| Q922U1 | Prpf3   | 18 | 23  | 26  | 3    | 14   | 20 |
| Q8CCF0 | Prpf31  | 11 | 12  | 15  | 2    | 4    | 11 |
| Q9DAW6 | Prpf4   | 18 | 20  | 26  | 4    | 12   | 19 |
| Q9R1C7 | Prpf40a | 20 | 23  | 34  | 3    | 6    | 24 |
| Q61136 | Prpf4b  | 8  | 15  | 23  | 0,01 | 3    | 12 |
| Q91YR7 | Prpf6   | 29 | 42  | 42  | 14   | 19   | 33 |
| Q99PV0 | Prpf8   | 92 | 109 | 117 | 32   | 53   | 94 |
| Q14C51 | Ptcd3   | 9  | 9   | 9   | 0,01 | 0,01 | 5  |
| Q3UEB3 | Puf60   | 12 | 11  | 15  | 0,01 | 4    | 10 |
| Q3UEB3 | Puf60   | 12 | 11  | 15  | 0,01 | 4    | 10 |
| Q61550 | Rad21   | 12 | 20  | 20  | 1    | 4    | 14 |
| Q8C570 | Rae1    | 11 | 11  | 15  | 1    | 2    | 10 |
| Q9EP71 | Rai14   | 43 | 47  | 52  | 9    | 18   | 44 |
| Q64012 | Raly    | 20 | 23  | 25  | 10   | 11   | 20 |
| Q9ERU9 | Ranbp2  | 52 | 84  | 95  | 12   | 28   | 74 |
| Q8BX09 | Rbbp5   | 7  | 13  | 12  | 1    | 2    | 5  |
| Q99KG3 | Rbm10   | 23 | 27  | 32  | 2    | 11   | 26 |
| Q8C2Q3 | Rbm14   | 21 | 27  | 32  | 10   | 16   | 26 |
| Q0VBL3 | Rbm15   | 14 | 14  | 19  | 2    | 7    | 13 |
| B2RY56 | Rbm25   | 22 | 28  | 33  | 6    | 10   | 26 |
| Q8VH51 | Rbm39   | 11 | 15  | 18  | 3    | 6    | 14 |
| Q8VH51 | Rbm39   | 11 | 15  | 18  | 3    | 6    | 14 |
| Q91YE7 | Rbm5    | 17 | 25  | 29  | 5    | 8    | 24 |
| Q91YE7 | Rbm5    | 17 | 25  | 29  | 5    | 8    | 24 |
| S4R1W5 | Rbm6    | 19 | 24  | 30  | 2    | 9    | 25 |
| Q9CQT2 | Rbm7    | 8  | 11  | 11  | 0,01 | 0,01 | 7  |
| Q9WV02 | Rbmx    | 16 | 19  | 24  | 11   | 11   | 18 |
| Q91VM5 | Rbmx11  | 18 | 19  | 26  | 11   | 10   | 19 |
| Q6PR54 | Rif1    | 9  | 20  | 27  | 0,01 | 4    | 21 |
| Q6PR54 | Rif1    | 9  | 20  | 27  | 0,01 | 4    | 21 |
| Q6PR54 | Rif1    | 9  | 20  | 27  | 0,01 | 4    | 21 |
| Q3UJU9 | Rmdn3   | 12 | 16  | 14  | 4    | 3    | 10 |
| P27659 | Rpl3    | 28 | 29  | 29  | 10   | 15   | 24 |
| Q9D8E6 | Rpl4    | 34 | 37  | 40  | 9    | 14   | 34 |
| P47911 | Rpl6    | 21 | 24  | 30  | 11   | 12   | 23 |
| P12970 | Rpl7a   | 23 | 25  | 27  | 11   | 13   | 23 |
| Q6P5B0 | Rrp12   | 14 | 22  | 30  | 2    | 3    | 22 |
| Q99LF4 | Rtcb    | 12 | 14  | 19  | 0,01 | 1    | 10 |
| P60122 | Ruvbl1  | 21 | 21  | 26  | 8    | 11   | 21 |
| Q9WTM5 | Ruvbl2  | 30 | 30  | 33  | 14   | 21   | 29 |
| D3YXK2 | Safb    | 28 | 33  | 39  | 5    | 16   | 29 |
| Q80YR5 | Safb2   | 40 | 47  | 53  | 9    | 21   | 44 |
| Q9ER74 | Sall1   | 5  | 13  | 19  | 0,01 | 1    | 10 |
| Q6P5E3 | Sall1   | 5  | 13  | 19  | 0,01 | 1    | 10 |

|            |          |     |     |     |      |      |      |
|------------|----------|-----|-----|-----|------|------|------|
| Q9Z315     | Sart1    | 40  | 48  | 51  | 11   | 21   | 44   |
| E9PZM7     | Scaf11   | 14  | 24  | 26  | 0,01 | 5    | 20   |
| Q80U72     | Scrib    | 24  | 34  | 33  | 2    | 4    | 27   |
| Q9EP97     | Senp3    | 5   | 10  | 13  | 0,01 | 2    | 7    |
| E9Q5F9     | Setd2    | 6   | 21  | 33  | 0,01 | 0,01 | 15   |
| E9Q5F9     | Setd2    | 6   | 21  | 33  | 0,01 | 0,01 | 15   |
| Q9D554     | Sf3a3    | 14  | 18  | 19  | 2    | 7    | 12   |
| Q99NB9     | Sf3b1    | 48  | 55  | 58  | 17   | 30   | 53   |
| G5E866     | Sf3b1    | 48  | 55  | 58  | 17   | 30   | 53   |
| Q3UJB0     | Sf3b2    | 31  | 37  | 38  | 10   | 19   | 32   |
| Q921M3     | Sf3b3    | 36  | 42  | 47  | 15   | 24   | 40   |
| Q3USH5     | Sfswap   | 5   | 19  | 22  | 0,01 | 3    | 14   |
| Q60520     | Sin3a    | 12  | 27  | 22  | 0,01 | 3    | 17   |
| Q60520     | Sin3a    | 12  | 27  | 22  | 0,01 | 3    | 17   |
| Q62141     | Sin3b    | 6   | 10  | 10  | 0,01 | 0,01 | 0,01 |
| Q62141     | Sin3b    | 6   | 10  | 10  | 0,01 | 0,01 | 6    |
| Q9CZU3     | Skiv2l2  | 29  | 33  | 36  | 2    | 9    | 26   |
| Q8CH25     | Sltm     | 20  | 28  | 34  | 0,01 | 9    | 25   |
| Q8BHJ9     | Slu7     | 12  | 15  | 18  | 0,01 | 0,01 | 12   |
| Q6DIC0     | Smarca2  | 29  | 34  | 35  | 0,01 | 0,01 | 25   |
| F2Z4A9     | Smarca2  | 29  | 34  | 35  | 0,01 | 0,01 | 25   |
| A0A0R4J170 | Smarca4  | 23  | 29  | 28  | 2    | 7    | 21   |
| Q3TKT4     | Smarca4  | 23  | 29  | 28  | 2    | 7    | 21   |
| Q3TKT4     | Smarca4  | 23  | 29  | 28  | 2    | 7    | 21   |
| P97496     | Smarcc1  | 8   | 17  | 16  | 3    | 0,01 | 10   |
| P97496     | Smarcc1  | 8   | 17  | 16  | 3    | 0,01 | 10   |
| Q99JR8     | Smarcd2  | 9   | 17  | 16  | 0,01 | 0,01 | 7    |
| Q99JR8     | Smarcd2  | 9   | 17  | 16  | 0,01 | 0,01 | 7    |
| O54941     | Smarce1  | 9   | 13  | 13  | 2    | 4    | 8    |
| Q9CU62     | Smc1a    | 41  | 57  | 58  | 9    | 25   | 52   |
| Q9CW03     | Smc3     | 41  | 49  | 53  | 9    | 19   | 41   |
| Q3UKJ7     | Smu1     | 11  | 16  | 19  | 2    | 6    | 12   |
| Q6P4T2     | Snrnp200 | 69  | 90  | 103 | 30   | 50   | 91   |
| Q6PE01     | Snrnp40  | 9   | 14  | 16  | 2    | 4    | 10   |
| A0A0B4J1E2 | Snw1     | 18  | 25  | 24  | 4    | 8    | 19   |
| A2ADB0     | Spen     | 13  | 26  | 35  | 0,01 | 2    | 26   |
| Q62261     | Sptbn1   | 123 | 136 | 140 | 44   | 71   | 131  |
| A0A087WNL7 | Srcap    | 5   | 12  | 11  | 0,01 | 0,01 | 6    |
| A0A087WQ44 | Srcap    | 5   | 12  | 11  | 0,01 | 0,01 | 6    |
| A0A087WNXi | Srcap    | 5   | 12  | 11  | 0,01 | 0,01 | 6    |
| Q922B9     | Ssfa2    | 17  | 22  | 22  | 2    | 2    | 17   |
| Q9D3E6     | Stag1    | 12  | 23  | 26  | 0,01 | 4    | 9    |
| O35638     | Stag2    | 14  | 21  | 18  | 0,01 | 0,01 | 11   |
| A2AFF6     | Stag2    | 14  | 21  | 18  | 0,01 | 0,01 | 11   |
| Q9D666     | Sun1     | 6   | 10  | 10  | 1    | 2    | 5    |
| O55201     | Supt5h   | 13  | 27  | 32  | 0,01 | 4    | 19   |
| Q9D198     | Syf2     | 8   | 9   | 12  | 0,01 | 1    | 6    |

|        |          |     |     |     |      |      |      |
|--------|----------|-----|-----|-----|------|------|------|
| Q6ZWQ0 | Syne2    | 97  | 187 | 235 | 6    | 38   | 154  |
| Q80UV9 | Taf1     | 14  | 30  | 30  | 0,01 | 6    | 17   |
| Q80UV9 | Taf1     | 14  | 30  | 30  | 0,01 | 6    | 17   |
| E9QAP7 | Taf4     | 9   | 12  | 14  | 1    | 3    | 10   |
| F8VPY2 | Taf5     | 10  | 19  | 20  | 2    | 8    | 16   |
| Q62311 | Taf6     | 17  | 24  | 27  | 1    | 6    | 16   |
| Q9R1C0 | Taf7     | 6   | 8   | 11  | 1    | 2    | 3    |
| Q8CGF7 | Tcerg1   | 9   | 16  | 20  | 0,01 | 1    | 9    |
| Q8CGF7 | Tcerg1   | 9   | 16  | 20  | 0,01 | 1    | 9    |
| Q9ERA6 | Tfip11   | 21  | 26  | 33  | 0,01 | 2    | 28   |
| B1AZI6 | Thoc2    | 7   | 12  | 17  | 0,01 | 2    | 8    |
| Q569Z6 | Thrap3   | 20  | 30  | 31  | 3    | 12   | 27   |
| P39447 | Tjp1     | 59  | 62  | 71  | 17   | 25   | 61   |
| B9EHJ3 | Tjp1     | 58  | 61  | 70  | 17   | 26   | 60   |
| Q9Z0U1 | Tjp2     | 35  | 43  | 41  | 7    | 16   | 36   |
| P58871 | Tnks1bp1 | 29  | 47  | 53  | 2    | 8    | 40   |
| Q04750 | Top1     | 23  | 23  | 21  | 15   | 9    | 17   |
| Q01320 | Top2a    | 13  | 20  | 26  | 4    | 11   | 20   |
| Q64511 | Top2b    | 39  | 55  | 63  | 9    | 23   | 44   |
| Q921T2 | Tor1aip1 | 13  | 16  | 22  | 4    | 6    | 17   |
| P70399 | Tp53bp1  | 12  | 25  | 27  | 0,01 | 3    | 15   |
| P70399 | Tp53bp1  | 12  | 25  | 27  | 0,01 | 3    | 15   |
| Q7M739 | Tpr      | 23  | 29  | 33  | 2    | 6    | 29   |
| F6ZDS4 | Tpr      | 23  | 29  | 33  | 2    | 6    | 29   |
| Q99KW3 | Triobp   | 8   | 16  | 14  | 0,01 | 0,01 | 9    |
| Q99KW3 | Triobp   | 8   | 16  | 14  | 0,01 | 0,01 | 9    |
| Q99KW3 | Triobp   | 8   | 16  | 14  | 0,01 | 0,01 | 9    |
| G5E870 | Trip12   | 5   | 28  | 34  | 0,01 | 3    | 22   |
| A2ASS6 | Ttn      | 61  | 138 | 185 | 17   | 61   | 0,01 |
| P68372 | Tubb4b   | 17  | 17  | 21  | 5    | 0,01 | 16   |
| P99024 | Tubb5    | 15  | 16  | 20  | 7    | 9    | 15   |
| E9QJS1 | Tyk2     | 9   | 12  | 14  | 0,01 | 0,01 | 8    |
| Q9R117 | Tyk2     | 9   | 12  | 14  | 0,01 | 0,01 | 8    |
| Q6NV83 | U2surp   | 27  | 34  | 36  | 6    | 14   | 30   |
| Q6NV83 | U2surp   | 27  | 34  | 36  | 6    | 14   | 30   |
| Q811S7 | Ubp1     | 13  | 17  | 19  | 2    | 4    | 14   |
| Q9EPU0 | Upf1     | 16  | 27  | 22  | 0,01 | 0,01 | 17   |
| Q9EPU0 | Upf1     | 16  | 27  | 22  | 0,01 | 0,01 | 17   |
| Q571H0 | Urb1     | 45  | 53  | 72  | 3    | 13   | 55   |
| E9Q7L1 | Urb2     | 17  | 28  | 34  | 6    | 14   | 29   |
| Q3TIX9 | Usp39    | 13  | 18  | 17  | 1    | 3    | 12   |
| Q8C7V3 | Utp15    | 19  | 20  | 24  | 4    | 8    | 17   |
| Q5XG71 | Utp20    | 48  | 56  | 72  | 2    | 16   | 61   |
| E9QK83 | Utp20    | 48  | 56  | 72  | 2    | 16   | 61   |
| E9Q6R7 | Utrn     | 121 | 139 | 150 | 25   | 60   | 128  |
| Q01853 | Vcp      | 14  | 17  | 23  | 1    | 4    | 14   |
| E9PZY8 | Virma    | 9   | 19  | 26  | 0,01 | 0,01 | 17   |

|        |        |    |    |    |      |      |    |
|--------|--------|----|----|----|------|------|----|
| A2AIV2 | Virma  | 9  | 19 | 26 | 0,01 | 0,01 | 17 |
| Q923D5 | Wbp11  | 4  | 6  | 17 | 0,01 | 2    | 6  |
| Q8K4P0 | Wdr33  | 5  | 15 | 21 | 0,01 | 4    | 13 |
| Q3TA68 | Wdr36  | 20 | 28 | 29 | 6    | 11   | 24 |
| Q3TAQ9 | Wdr36  | 20 | 28 | 29 | 6    | 11   | 24 |
| Q6ZQL4 | Wdr43  | 13 | 18 | 20 | 0,01 | 6    | 16 |
| Q3U821 | Wdr75  | 14 | 16 | 25 | 3    | 6    | 20 |
| Q9DCD2 | Xab2   | 17 | 22 | 27 | 0,01 | 7    | 22 |
| Q9DBR1 | Xrn2   | 6  | 11 | 16 | 0,01 | 0,01 | 7  |
| Q9DBR1 | Xrn2   | 6  | 11 | 16 | 0,01 | 0,01 | 7  |
| D3YWX2 | Ylpm1  | 19 | 33 | 45 | 0,01 | 6    | 27 |
| E9Q5K9 | Ythdc1 | 9  | 13 | 17 | 0,01 | 4    | 12 |
| E9Q5K9 | Ythdc1 | 9  | 13 | 17 | 0,01 | 4    | 12 |
| E9Q5K9 | Ythdc1 | 9  | 13 | 17 | 0,01 | 4    | 12 |
| Q8K0L9 | Zbtb20 | 13 | 20 | 20 | 0,01 | 3    | 15 |
| Q8K0L9 | Zbtb20 | 13 | 20 | 20 | 0,01 | 3    | 15 |
| E9Q784 | Zc3h13 | 4  | 19 | 24 | 0,01 | 0,01 | 14 |
| Q8BJ05 | Zc3h14 | 12 | 21 | 24 | 0,01 | 5    | 15 |
| Q9CYA6 | Zcchc8 | 9  | 11 | 15 | 0,01 | 2    | 8  |
| Q8C827 | Zfp62  | 14 | 23 | 23 | 0,01 | 6    | 19 |
| Q8C827 | Zfp62  | 14 | 23 | 23 | 0,01 | 6    | 19 |
| E9QML5 | Zfp638 | 18 | 45 | 55 | 0,01 | 10   | 35 |
| O88532 | Zfr    | 11 | 19 | 21 | 0,01 | 0,01 | 12 |
| A2A483 | Zmynd8 | 11 | 17 | 23 | 0,01 | 3    | 16 |
| Q3UH28 | Zmynd8 | 11 | 17 | 23 | 0,01 | 3    | 16 |
| E9Q8D1 | Zmynd8 | 11 | 17 | 23 | 0,01 | 3    | 16 |
| Q3U1M7 | Zmynd8 | 11 | 17 | 23 | 0,01 | 3    | 16 |
| Q61624 | Znf148 | 4  | 12 | 18 | 0,01 | 4    | 9  |
