# Supplementary material for: The Splicing Factor XAB2 interacts with ERCC1-XPF and XPG for RNA-loop processing during mammalian development
Source: bioRxiv or medRxiv preprint supplement (doi:10.1101/2020.07.20.211441), 2020-07-21
Supplement: Supplementary file [file media-7.pdf]

A.

**Biological processes (GO)** .....:FDR≤0.05
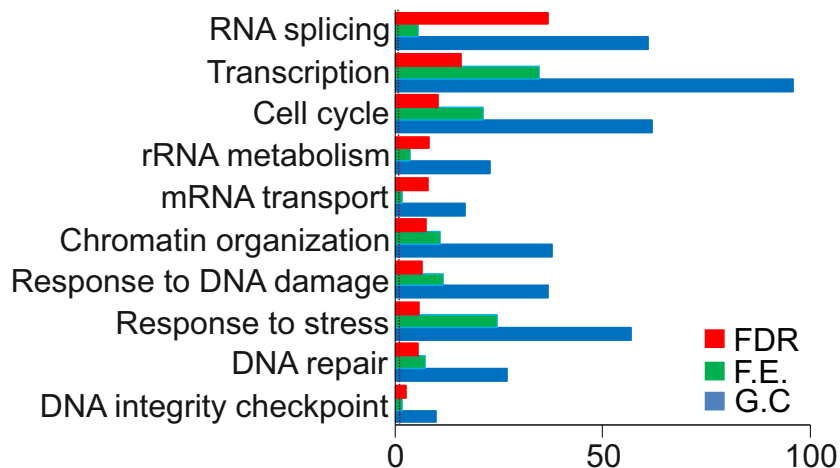

B.

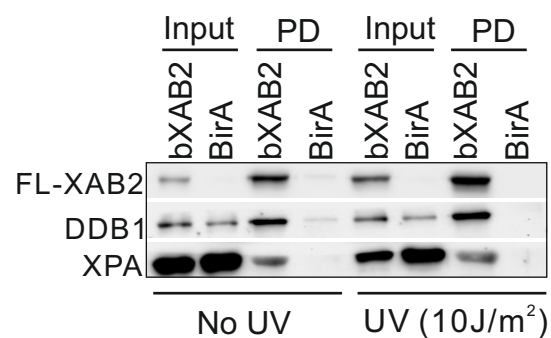

C.

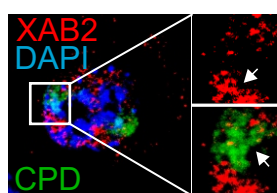

D.

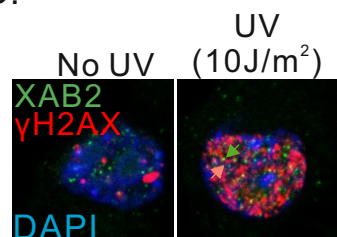

E.

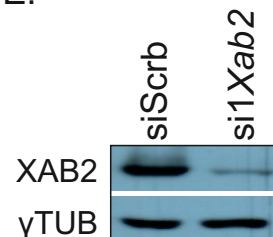

F.

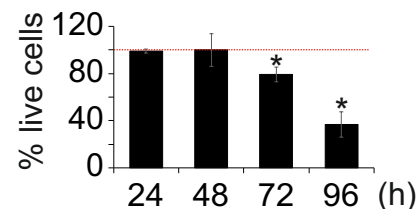

G.

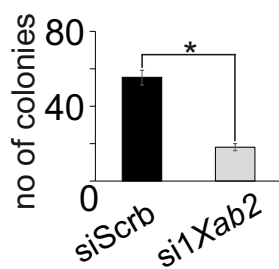

H.

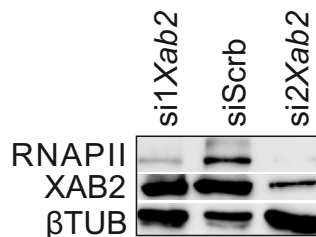

I.

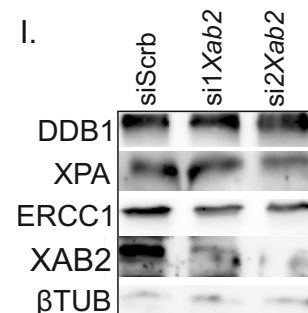

J.

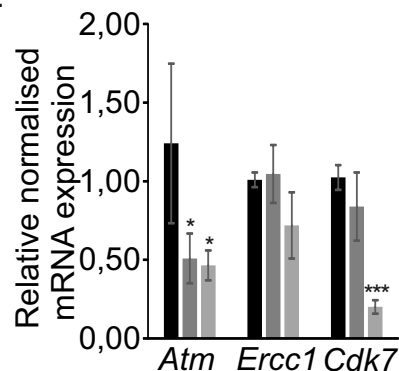

K.

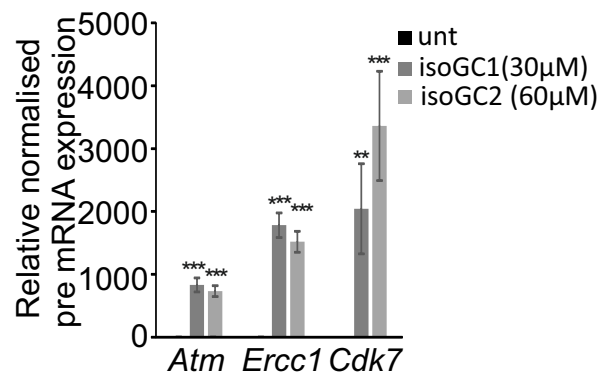

L.

|              | Considered    | Pdiff>0.8   | Volvano<br>(all non redudant) | Violin plots<br>(IR, EX, Pdiff >0.8) | Differentially spliced<br>Pdiff>0.8 and  ΔPSI >5 |
|--------------|---------------|-------------|-------------------------------|--------------------------------------|--------------------------------------------------|
| IR           | 63180         | 849         | 63180                         | 849                                  | 262                                              |
| EX           | 22160         | 741         | 22160                         | 741                                  | 358                                              |
| Alt3'        | 23892         | 434         | 10957                         |                                      | 89                                               |
| Alt5'        | 17103         | 240         | 7752                          |                                      | 65                                               |
| <b>Total</b> | <b>126335</b> | <b>2264</b> | <b>104049</b>                 | <b>1590</b>                          | <b>774</b>                                       |
