# Supplementary material for: The Splicing Factor XAB2 interacts with ERCC1-XPF and XPG for RNA-loop processing during mammalian development
Source: bioRxiv or medRxiv preprint supplement (doi:10.1101/2020.07.20.211441), 2020-07-21

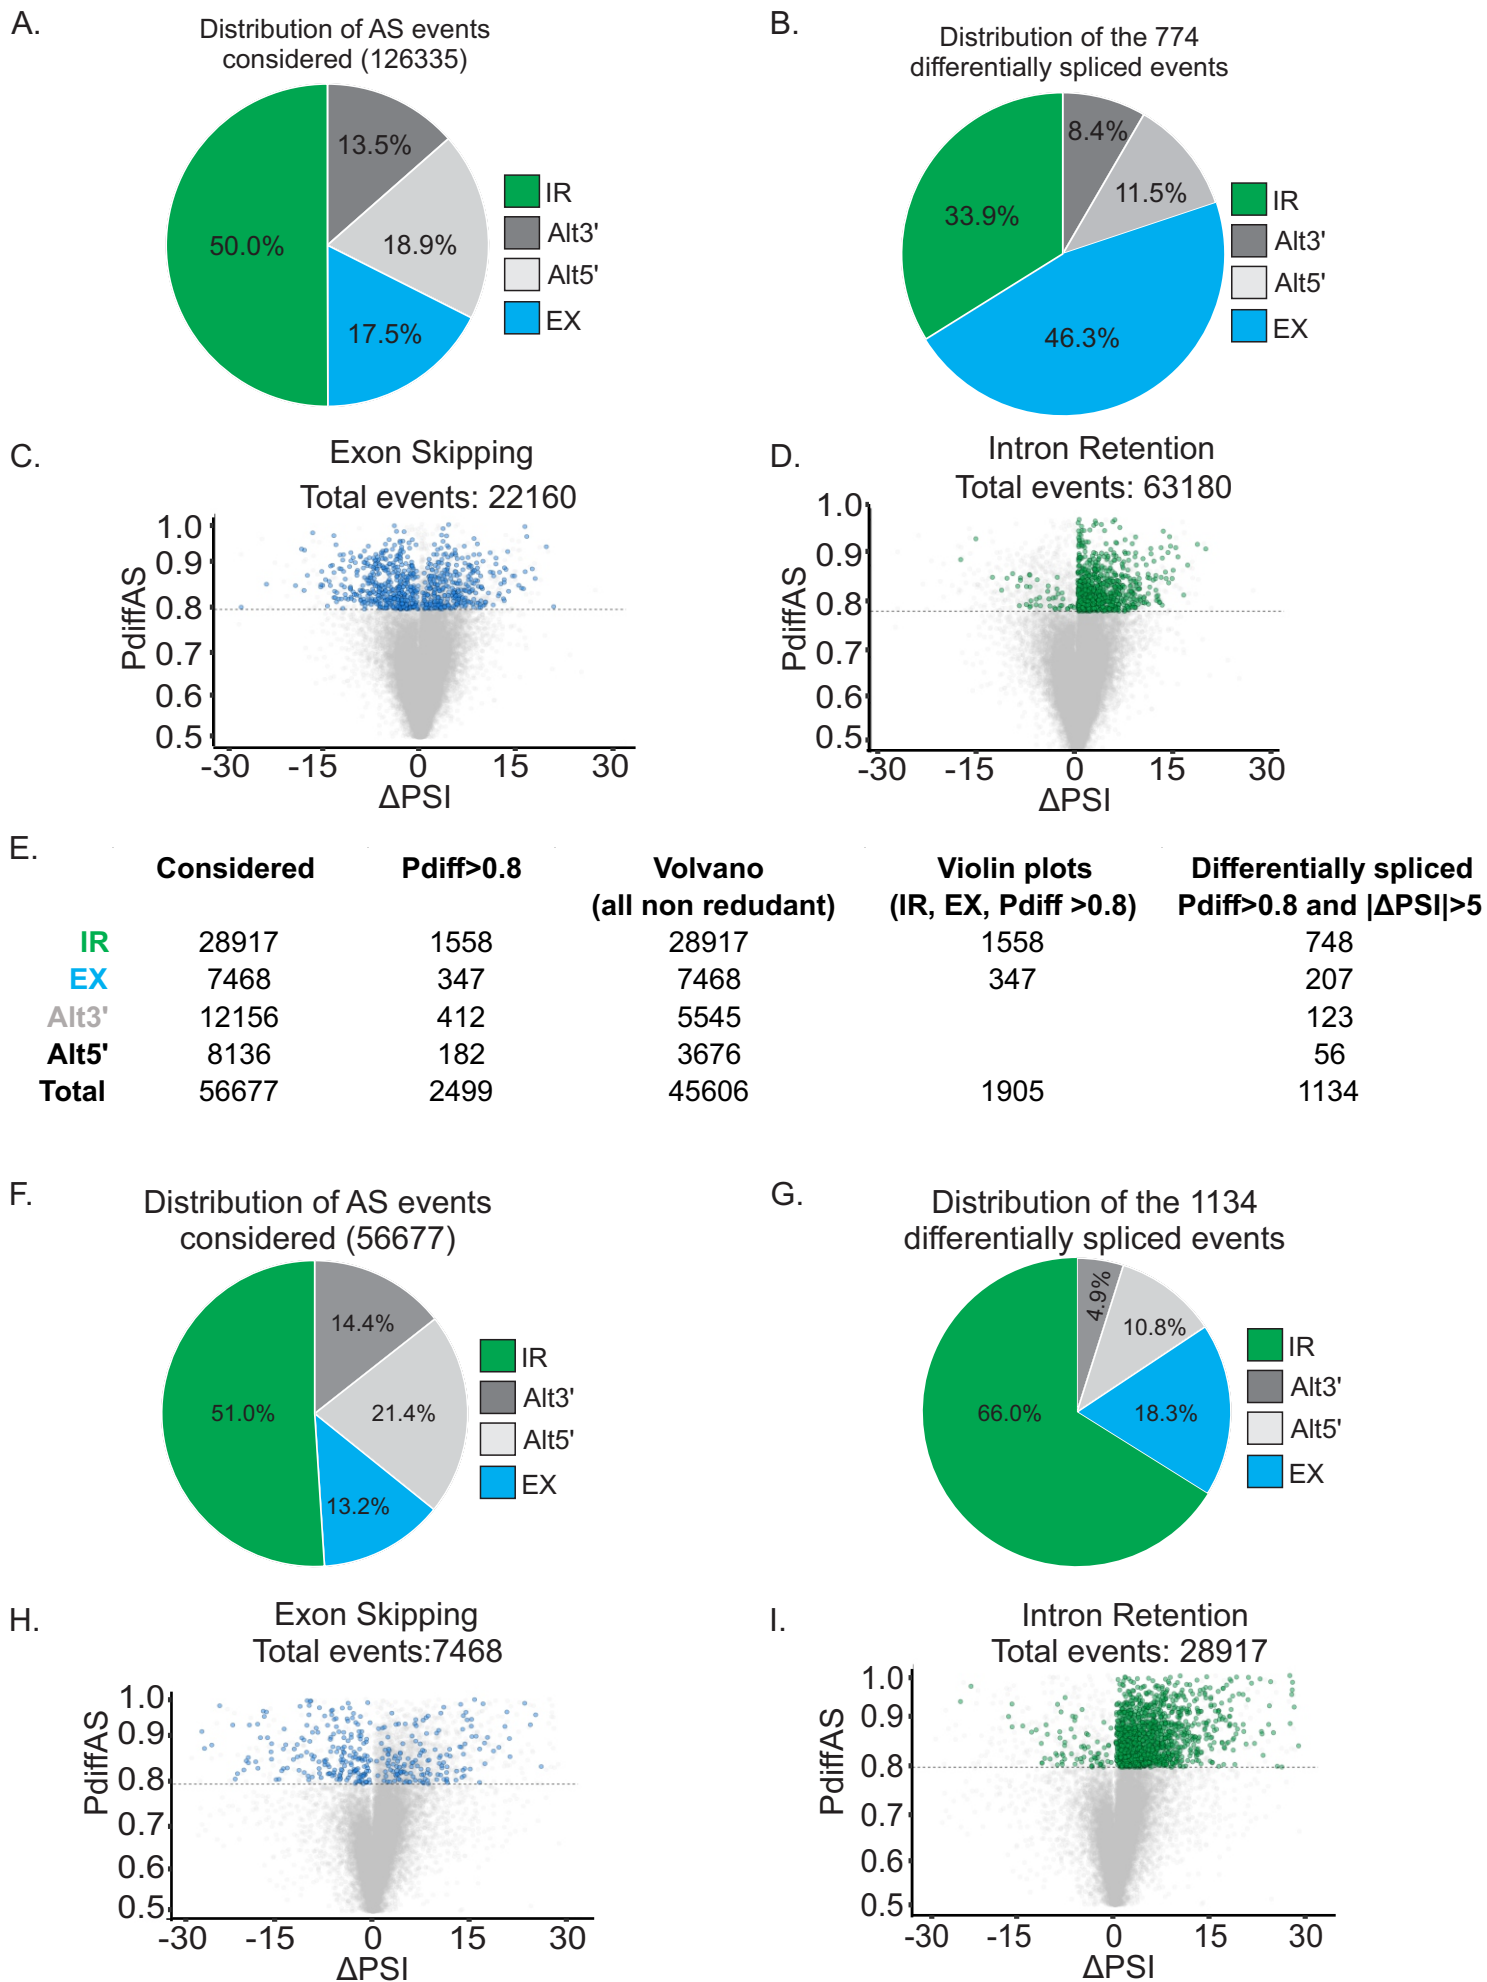

Supplement: Supplementary file [file media-8.pdf]
